# Supplementary material for: Protease-Activated Receptor 1 in Human Carotid Atheroma Is Significantly Related to Iron Metabolism, Plaque Vulnerability, and the Patient’s Age
Source: MDPI journal article supplement (doi:10.3390/ijms23126363), 2022-06-07
Supplement: s1 [file s1]

Supplemented Table S1. Basic clinical information

|                          | Total           | Asymptomatic    | Symptomatic     |    |
|--------------------------|-----------------|-----------------|-----------------|----|
| n                        | 39              | 4               | 35              | p  |
| Ages, y $\pm$ SE         | 71.1 $\pm$ 1.5  | 78.0 $\pm$ 1.9  | 70.3 $\pm$ 1.6  | ns |
| Sex, male (% , n)        | 64.1 (25)       | 75.0 (3)        | 62.8 (22)       | ns |
| Diabetes mellitus, % (n) | 12.8 (5)        | 25 (1)          | 11.4 (4)        | ns |
| Hypertesion, % (n)       | 74.3 (29)       | 50.0 (2)        | 77.1 (27)       | ns |
| Smoking, % (n)           | 41.0 (16)       | 0 (0)           | 45.7 (16)       | ns |
| Statin treatment, % (n)  | 46.1 (18)       | 25.0 (1)        | 48.6 (17)       | ns |
| Total cholesterol        | 5.01 $\pm$ 0.3  | 5.2 $\pm$ 0.6   | 4.98 $\pm$ 0.3  | ns |
| LDL                      | 2.79 $\pm$ 0.2  | 2.67 $\pm$ 0.74 | 2.81 $\pm$ 0.2  | ns |
| HDL                      | 1.20 $\pm$ 0.09 | 1.70 $\pm$ 0.47 | 1.12 $\pm$ 0.06 | ns |
| TG                       | 2.04 $\pm$ 0.2  | 1.87 $\pm$ 0.35 | 2.07 $\pm$ 0.23 | ns |
| Hb                       | 142 $\pm$ 1.89  | 141 $\pm$ 13.02 | 142 $\pm$ 1.83  | ns |
| MCV                      | 92.4 $\pm$ 0.7  | 95.0 $\pm$ 2.5  | 92.2 $\pm$ 0.7  | ns |
| MCHC                     | 330 $\pm$ 1,8   | 332 $\pm$ 5.1   | 330 $\pm$ 1.9   | ns |
| EVF                      | 43.2 $\pm$ 0.6  | 42 $\pm$ 3.5    | 43.3 $\pm$ 0.6  | ns |
